# Supplementary material for: Meta-genome-wide association studies identify a locus on chromosome 1 and multiple variants in the MHC region for serum C-peptide in type 1 diabetes
Source: PubMed Central journal article supplement (PMC5876265; doi:10.1007/s00125-018-4555-9), 2018-02-05
Supplement: 125_2018_4555_MOESM1_ESM.pdf [file 125_2018_4555_MOESM1_ESM.pdf]

## ELECTRONIC SUPPLEMENTARY MATERIAL

### SUPPLEMENTARY METHODS

#### Genotyping, Quality Control and Imputation:

Genotyping was performed using both Illumina 1M [1] and HumanCoreExome-12 v1.1 BeadArrays (Illumina, San Diego, CA, USA) in DCCT; Illumina HumanCoreExome-24 BeadArrays (v1.0) in Medalist; and Illumina HumanCoreExome-12 BeadArrays in CACTI (v1.0), WESDR (v1.0) and EDC (v1.1).

Details of genotyping and quality control regarding Illumina 1M bead array in DCCT were published previously [1].

HumanCoreExome genotyping, quality control and imputation for all five studies (DCCT, CACTI, EDC, Joslin 50 Year Medalist and WESDR) were performed in a single site by one laboratory and one analytic team at the University of Virginia (UVA). SNPs with 20% (or 5% for rare variants) MAF difference with 1000 Genomes were removed. SNP and subject call rates were set to 95% and 98%, respectively. SNPs deviated from Hardy-Weinberg equilibrium ( $p < 1E-6$ ) were excluded. Ten principal components (PCs) were calculated and outliers according to PC analysis (PCA) were excluded. To detect cryptically related individuals, identical-by-state estimates between all pairs of individuals were performed, and one from each pair was excluded.

SHAPEIT v2 (r837) is used for haplotype phasing [2, 3]. Autosomal SNPs ungenotyped on Illumina 1M and HumanCoreExome BeadArrays were imputed using the 1000 Genomes data phase3, v5 (updated on Oct 20, 2015)[4]; and IMPUTE2 v.2.3.0 ([https://mathgen.stats.ox.ac.uk/impute/impute\\_v2.html](https://mathgen.stats.ox.ac.uk/impute/impute_v2.html))[5] and Minimac3 v1.0.13 (updated on Oct 15, 2015)(<http://csg.sph.umich.edu/abecasis/MaCH/index.html>)[6, 7], respectively.

All SNP coordinates mentioned in the paper are based on Human hg19.

#### Type 1 Diabetes (T1D) Genetic Risk Score (GRS):

SNP genotypes regarding both sets of T1D loci derived from Oram et al [8] and Onengut-Gumuscu et al [9] were extracted from dosage data according to the best guess using GTOOL, version 0.7.5 (<http://www.well.ox.ac.uk/~cfreeman/software/gwas/gtool.html>). Subsequently, T1D GRS was generated by summing, across all SNPs, the product of the number of risk-increasing alleles (0, 1, or 2) at each SNP and the corresponding natural log (OR) [8].

The *DR3* (*DRB1\*0301-DQA1\*0501-DQB1\*0201*) and *DR4-DQ8* (*DRB1\*04-DQA1\*0301-DQB1\*0302*) haplotypes do not fit this log-additive model, with *DR3/DR4-DQ8* individuals having the highest odds ratio. Therefore, weights for *DR3/DR4-DQ8* were assigned based on imputed haplotypes, and odds ratios from Winkler et al [8, 10, 11].

Association of each of T1D GRS, *DR3/DR4* GRS, and six *DR3/DR4* genotype categories (*DR3/DR3*, *DR3/DR4*, *DR4/DR4*, *DR3/X*, *X/DR4*, *X/X*) with stimulated C-peptide at DCCT eligibility was tested using Tobit models (QLIM procedure, SAS version 9.4 (SAS, Cary, NC)). The Primary Cohort, Secondary Cohort with duration 1-5 years, and Secondary Cohort with duration 5-15 years were analyzed

separately, adjusting for sex, age at diagnosis and duration; and the results were combined through meta-analysis. The association of each genetic factor with fasting C-peptide at DCCT eligibility was also tested in all subjects further adjusting for Cohort (Primary vs. Secondary).

The association of T1D GRS and DR3/DR4 GRS with rate of decline in stimulated C-peptide over time in DCCT was investigated using linear mixed models (as described in the main text).

## SUPPLEMENTARY TABLES

**ESM Table 1:** Characteristics of the DCCT subjects and their first-degree affected relatives included in the family study

|                                                 | <b>Proband<br/>(N = 98)</b> | <b>First-degree* Affected Relative<br/>(N = 109)</b> |
|-------------------------------------------------|-----------------------------|------------------------------------------------------|
| Sex (Male)                                      | 52 (53.1%)                  | 58 (53.2%)                                           |
| Age at Diagnosis (Years)                        | 21.1 (7.4)                  | 22.0 (14.5)                                          |
| T1D Duration (Years)                            | 5.9 (4.2)                   | 16.3 (10.1)                                          |
| Detectable Stimulated C-peptide (>0.03 pmol/mL) | 52 (47.7%)                  | 20 (18.4%)                                           |

\* Sibling or parent  
Values are Mean (SD) or N (%)

**ESM Table 2:** Number of first-degree relatives with non-detectable stimulated C-peptide for probands in the DCCT family study

| <b>Stimulated C-peptide in Proband</b>               | <b>Stimulated C-peptide in First-Degree Relatives</b> |                                                    |              |
|------------------------------------------------------|-------------------------------------------------------|----------------------------------------------------|--------------|
|                                                      | <b>Undetectable (<math>\leq 0.03</math> pmol/mL)</b>  | <b>Detectable (<math>&gt; 0.03</math> pmol/mL)</b> | <b>Total</b> |
| <b>Undetectable (<math>\leq 0.03</math> pmol/mL)</b> | 48 (84.2%)                                            | 9 (15.8%)                                          | 57           |
| <b>Detectable (<math>&gt; 0.03</math> pmol/mL)</b>   | 41 (78.8%)                                            | 11 (21.2%)                                         | 52           |
| <b>Total</b>                                         | 89                                                    | 20                                                 | 109          |

Generalized estimating equation (GEE) regression adjusting for relatives' sex, age at diagnosis and T1D duration showed a higher proportion of non-detectable C-peptide in relatives of probands who had non-detectable C-peptide compared to those with detectable C-peptide (OR = 1.45) but precision was insufficient to exclude a chance finding (OR (CI) = (0.48-4.44),  $p = 0.51$ ).

**ESM Table 3:** C-peptide measurement methods in different studies

| <b>Study</b> | <b>Time</b>                                           | <b>Assay</b>                                                                         | <b>Lower Limit of Detection</b> |
|--------------|-------------------------------------------------------|--------------------------------------------------------------------------------------|---------------------------------|
| DCCT         | After 8-12 hr fasting<br>90 mins after standard meal* | M-1230 antiserum and other reagents obtained from Novo Industri (Bagsvaerd, Denmark) | 0.03 pmol/mL                    |
| CACTI        | After 12 hr fasting                                   | ALPCO C-peptide ELISA Kit (ALPCO, Salem, NH)                                         | 16 pmol/L                       |
| EDC          | After 8 hr fasting                                    | Mercodia Ultrasensitive C-peptide ELISA (Mercodia AB, Uppsala, Sweden)               | 1.15 pmol/L                     |
| Medalist     | Non-fasting                                           | Radioimmunoassay (Beckman Coulter, Fullerton, CA)                                    | 0.05 pmol/mL                    |
| WESDR        | Non-fasting                                           | Radioimmunoassay with Heding's M1230 antiserum                                       | 0.03 pmol/mL                    |

\* 6 mL of Sustacal/kg of body weight to a maximum of 360 mL (Mead-Johnson, Evansville, Indiana; 1 calorie/mL; 55% carbohydrate, 24% protein, and 21% fat) in a period not exceeding 10 minutes

**ESM Table 4:** Characteristics of the DCCT participants included in the stimulated C-peptide analysis at eligibility

| <b>Cohort</b>                   | <b>Primary</b>   | <b>Secondary<br/>Duration 1-5 Yrs</b> | <b>Secondary<br/>Duration 5-15 Yrs</b> | <b>All</b>       |
|---------------------------------|------------------|---------------------------------------|----------------------------------------|------------------|
| N                               | 651              | 135                                   | 517                                    | 1,303            |
| Sex (Male)                      | 341 (52.4%)      | 83 (61.5%)                            | 271 (52.4%)                            | 695 (53.3%)      |
| Age at T1D Diagnosis (years)    | 23.9 (7.8)       | 29.0 (7.3)                            | 17.2 (7.1)                             | 21.2 (8.1)       |
| Duration (Years)                | 2.6 (1.3)        | 3.2 (1.3)                             | 10.2 (2.7)                             | 5.7 (4.2)        |
| Oram et al T1D GRS              | 15.85 (1.53)     | 16.01 (1.53)                          | 16.05 (1.45)                           | 15.95 (1.50)     |
| Onengut_Gumuscu et al T1D GRS   | 9.63 (0.85)      | 9.61 (0.89)                           | 9.61 (0.88)                            | 9.59 (0.87)      |
| Stimulated C-peptide (pmol/mL)  |                  |                                       |                                        |                  |
| N with Detectable Values        | 495 (76.0%)      | 102 (75.6%)                           | 130 (25.1%)                            | 727 (55.8%)      |
| Not Transformed                 |                  |                                       |                                        |                  |
| All                             | 0.13 (0.04-0.26) | 0.11 (0.04-0.22)                      | 0.03 (0.03-0.04)                       | 0.05 (0.03-0.17) |
| Subjects with Detectable Values | 0.19 (0.10-0.30) | 0.16 (0.10-0.30)                      | 0.07 (0.05-0.12)                       | 0.15 (0.08-0.27) |
| Natural Log Transformed         |                  |                                       |                                        |                  |
| All                             | -2.20 (0.95)     | -2.27 (0.92)                          | -3.26 (0.49)                           | -2.63 (0.95)     |
| Subjects with Detectable Values | -1.78 (0.68)     | -1.87 (0.69)                          | -2.53 (0.49)                           | -1.93 (0.71)     |
| Fasting C-peptide (pmol/mL)     |                  |                                       |                                        |                  |
| N with Detectable Values        | 398 (61.1%)      | 84 (62.2%)                            | 71 (13.7)                              | 553 (42.4%)      |
| Not Transformed                 |                  |                                       |                                        |                  |
| All                             | 0.06 (0.03-0.11) | 0.05 (0.03-0.09)                      | 0.03 (0.03-0.03)                       | 0.03 (0.03-0.07) |
| Subjects with Detectable Values | 0.09 (0.06-0.14) | 0.08 (0.06-0.12)                      | 0.05 (0.04-0.07)                       | 0.08 (0.06-0.13) |
| Natural Log Transformed         |                  |                                       |                                        |                  |
| All                             | -2.81 (0.69)     | -2.87 (0.64)                          | -3.42 (0.25)                           | -3.06 (0.63)     |
| Subjects with Detectable Values | -2.37 (0.53)     | -2.49 (0.51)                          | -2.87 (0.32)                           | -2.45 (0.53)     |

Values are Mean (SD), N (%) or mean (25-75 percentiles).

**ESM Table 5:** Characteristics of the study participants included in the fasting/random C-peptide analysis

| Study                             | Fasting C-peptide |                                   | Random C-peptide              |                    |                   |
|-----------------------------------|-------------------|-----------------------------------|-------------------------------|--------------------|-------------------|
|                                   | DCCT              | CACTI                             | EDC                           | Medalist           | WESDR             |
| N                                 | 1,340             | 529                               | 150                           | 906                | 591               |
| Sex (Male)                        | 707 (52.8)        | 235 (44.4)                        | 76 (50.7)                     | 409 (45.1)         | 297 (50.3)        |
| Age at T1D Diagnosis (years)      | 21.2 (8.1)        | 13.1 (8.0)                        | 8.3 (4.1)                     | 11.1 (6.4)         | 14.5 (7.5)        |
| Duration (Years)                  | 5.6 (4.2)         | 34.1 (9.0)                        | 43.0 (6.7)                    | 54.7 (5.8)         | 19.2 (9.0)        |
| N with Detectable C-peptide       | 572 (42.7%)       | 83 (15.7%)                        | 14 (9.3%)                     | 304 (33.6%)        | 68 (11.5%)        |
| C-peptide                         |                   |                                   |                               |                    |                   |
| All Subjects                      | 0.03 (0.03-0.07)* | 16 (16-16) <sup>†</sup>           | 1.15 (1.15-1.15) <sup>†</sup> | 0.05 (0.05, 0.13)* | 0.03 (0.03-0.03)* |
| Subjects with Detectable Values   | 0.08 (0.06-0.13)* | 58.82 (28.00-278.40) <sup>†</sup> | 3.75 (2.69-9.88) <sup>†</sup> | 0.20 (0.13, 0.31)* | 0.14 (0.07-0.46)* |
| C-peptide Natural Log Transformed |                   |                                   |                               |                    |                   |
| All Subjects                      | -3.06 (0.63)      | 3.05 (0.82)                       | 0.28 (0.53)                   | -2.53 (0.76)       | -3.31 (0.64)      |
| Subjects with Detectable Values   | -2.45 (0.53)      | 4.51 (1.32)                       | 1.65 (1.02)                   | -1.61 (0.67)       | -1.81 (0.99)      |

Values are Mean (SD), N (%) or mean (25-75 percentiles).

\* pmol/mL

<sup>†</sup> pmol/L

**ESM Table 6:** Characteristics of the DCCT participants included in the longitudinal stimulated C-peptide analysis

| <b>Study</b>                                 | <b>Eligibility</b> | <b>Year 1</b>    | <b>Year 2</b>    | <b>Year3</b>     | <b>Year 4</b>    | <b>Year 5</b>    | <b>Year 6</b>    |
|----------------------------------------------|--------------------|------------------|------------------|------------------|------------------|------------------|------------------|
| N                                            | 258                | 248              | 246              | 200              | 116              | 40               | 21               |
| Sex (Male)                                   | 139 (53.9%)        | 132 (53.2%)      | 137 (55.7%)      | 107 (53.5%)      | 64 (55.2%)       | 18 (45.0%)       | 11 (52.4%)       |
| Cohort (Primary)                             | 222 (86.1%)        | 213 (85.9%)      | 210 (85.4%)      | 167 (83.5%)      | 89 (76.7%)       | 28 (70.0%)       | 17 (81.0%)       |
| Treatment Group (Conventional)               | 137 (53.1%)        | 132 (53.2%)      | 131 (53.3%)      | 102 (51.0%)      | 59 (50.9%)       | 18 (45.0%)       | 10 (47.6%)       |
| Age at T1D Diagnosis (years)                 | 25.9 (6.8)         | 25.9 (6.9)       | 25.8 (6.8)       | 26.1 (6.8)       | 26.5 (6.2)       | 25.2 (6.5)       | 23.1 (8.3)       |
| Duration at Eligibility (Months)             | 2.1 (1.1)          | 2.1 (1.1)        | 2.1 (1.1)        | 2.2 (1.1)        | 2.3 (1.1)        | 2.6 (1.2)        | 2.5 (1.0)        |
| N with Detectable stimulated C-peptide       | 258                | 244              | 231              | 179              | 110              | 38               | 13               |
| Stimulated C-peptide                         |                    |                  |                  |                  |                  |                  |                  |
| All Subjects                                 | 0.31 (0.26-0.38)   | 0.19 (0.12-0.31) | 0.14 (0.07-0.23) | 0.11 (0.07-0.23) | 0.13 (0.08-0.22) | 0.11 (0.07-0.24) | 0.04 (0.03-0.09) |
| Subjects with Detectable Values              | 0.31 (0.26-0.38)   | 0.20 (0.13-0.31) | 0.15 (0.09-0.24) | 0.13 (0.09-0.24) | 0.13 (0.08-0.22) | 0.12 (0.07-0.24) | 0.09 (0.05-0.10) |
| Stimulated C-peptide Natural Log Transformed |                    |                  |                  |                  |                  |                  |                  |
| All Subjects                                 | -1.16 (0.24)       | -1.71 (0.71)     | -2.03 (0.79)     | -2.13 (0.81)     | -2.06 (0.72)     | -2.16 (0.77)     | -2.89 (0.71)     |
| Subjects with Detectable Values              | -1.16 (0.24)       | -1.68 (0.67)     | -1.94 (0.72)     | -1.97 (0.69)     | -1.98 (0.65)     | -2.09 (0.72)     | -2.51 (0.68)     |



**ESM Table 7:** Association of rs61211515 (T/-) with stimulated C-peptide at DCCT eligibility based on subjects status of having repeated measures of stimulated C-peptide

| Having Repeated Measures of Stimulated C-peptide | N (Detectable/Undetectable) | BETA   | SE    | P*      |
|--------------------------------------------------|-----------------------------|--------|-------|---------|
| Yes                                              | 258 (258/0)                 | 0.002  | 0.031 | 0.946   |
| No                                               | 1,045 (469/576)             | -0.459 | 0.079 | 6.56E-9 |
| Duration 1-5 Years                               | 520 (339/181)               | -0.412 | 0.089 | 3.88E-6 |
| Duration 5-15 Years                              | 525 (130/395)               | -0.612 | 0.168 | 2.58E-4 |
| All                                              | 1,303 (727/576)             | -0.395 | 0.72  | 5.25E-8 |

Associations were tested using QLIM procedure in SAS version 9.4 (SAS, Cary, NC), and are based on extracted genotypes from dosage data according to the best guess using GTOOL, version 0.7.5 (<http://www.well.ox.ac.uk/~cfreeman/software/gwas/gtool.html>) adjusting for sex, age at diagnosis, T1D duration and cohort (primary vs. secondary).

\* rs61211515 (T/-) association with stimulated C-peptide at DCCT eligibility was significantly heterogeneous between those with values  $\leq 0.20$  and  $> 0.20$  ( $p = 0.003$ ).

**ESM Table 8:** Association of rs61211515 (T/TT) with C-peptide

|                                               | INFO/R <sup>2</sup> | MAF  | BETA* | SE   | P     | Het I <sup>2</sup> | Het P |
|-----------------------------------------------|---------------------|------|-------|------|-------|--------------------|-------|
| Stimulated C-peptide                          |                     |      |       |      |       |                    |       |
| DCCT Primary Cohort                           | 0.95                | 0.09 | -0.12 | 0.12 | 0.346 |                    |       |
| DCCT Secondary Cohort, Duration 1-5 Years     | 0.95                | 0.09 | 0.18  | 0.25 | 0.460 |                    |       |
| DCCT Secondary Cohort, Duration 5-15 Years    | 0.95                | 0.09 | -0.22 | 0.22 | 0.300 |                    |       |
| Meta-GWAS                                     |                     |      | 0.09  | 0.09 | 0.349 | 0                  | 0.443 |
| Fasting C-peptide                             |                     |      |       |      |       |                    |       |
| DCCT                                          | 0.94                | 0.08 | -0.16 | 0.08 | 0.062 |                    |       |
| CACTI                                         | 0.97                | 0.10 | -0.22 | 0.48 | 0.642 |                    |       |
| EDC                                           | 0.96                | 0.12 | -0.77 | 1.14 | 0.499 |                    |       |
| Meta-GWAS                                     |                     |      |       |      | 0.053 | 0                  | 0.828 |
| Random C-peptide                              |                     |      |       |      |       |                    |       |
| WESDR                                         | 0.94                | 0.08 | -0.10 | 0.54 | 0.848 |                    |       |
| Medalist                                      | 0.96                | 0.10 | -0.10 | 0.06 | 0.128 |                    |       |
| Meta-analysis                                 |                     |      |       |      | 0.192 | 0                  | 0.419 |
| Stimulated/Fasting/Random C-peptide Meta-GWAS |                     |      |       |      | 0.066 | 0                  | 0.905 |

INFO/R<sup>2</sup>: Quality of imputation

\* C-peptide is measured with different assays in pmol/mL in DCCT, Medalist and WESDR; and in pmol/L in CACTI and EDC. It is also natural log transformed.

**ESM Table 9:** Association of rs61211515 genotype categories with stimulated C-peptide at DCCT eligibility compared to reference (having 2 copies of reference allele)

| <b>Genotype</b> | <b>Frequency (%)</b> | <b>BETA</b> | <b>SE</b> | <b>P</b> | <b>LS means (95% CI)*</b> |
|-----------------|----------------------|-------------|-----------|----------|---------------------------|
| Del_Del         | 30 (2.30)            | -0.83       | 0.27      | 2.07E-3  | -2.94 (-3.22, -2.67)      |
| Del_Ref         | 327 (25.10)          | -0.39       | 0.09      | 7.10E-6  | -2.73 (-2.81, -2.65)      |
| In_Del          | 31 (2.38)            | -0.85       | 0.26      | 9.71E-4  | -2.99 (-3.26, -2.72)      |
| In_In           | 7 (0.54)             | -0.21       | 0.48      | 6.77E-1  | -2.67 (-3.24, -2.11)      |
| In_Ref          | 172 (13.20)          | -0.17       | 0.11      | 1.13E-1  | -2.63 (-2.75, -2.52)      |
| Ref_Ref         | 736 (56.49)          | -           | -         | -        | -2.55 (-2.60, -2.49)      |

LS: Least square, Del: T deletion, In: T insertion, Ref: Reference

Results are based on Tobit models of stimulated C-peptide at DCCT eligibility and extracted genotypes adjusting for sex, age at diagnosis, T1D duration and cohort (primary vs. secondary). Least square means are calculated based on linear regression.

**ESM Table 10:** LD between the top SNPs in the MHC region from different meta-GWAS and the SNP tagging *HLA-A\*24*

|                                     | <b>rs9260151<br/>Chr6:29911030</b> | <b>rs1264813<br/>Chr6:29939900</b> | <b>rs61211515<br/>Chr6:30100975</b> | <b>rs3135002<br/>Chr6:32668439</b> |
|-------------------------------------|------------------------------------|------------------------------------|-------------------------------------|------------------------------------|
| <b>rs9260151<br/>Chr6:29911030</b>  | -                                  | 0.02                               | 0.01                                | 0.00                               |
| <b>rs1264813<br/>Chr6:29939900</b>  | 1                                  | -                                  | 0.38                                | 0.00                               |
| <b>rs61211515<br/>Chr6:30100975</b> | 0.47                               | 0.85                               | -                                   | 0.00                               |
| <b>rs3135002<br/>Chr6:32668439</b>  | 0.03                               | 0.07                               | 0.00                                | -                                  |

The values above and below the diagonal are  $r^2$  and  $D'$ , respectively. The values are based on EUR population of the 1000 Genomes Project (phase 3).

**ESM Table 11:** Association of the top SNPs in the MHC region with stimulated/fasting C-peptide at DCCT eligibility when all three included in the same model

|                           | BP         | MAF  | Stimulated C-peptide |         | Fasting C-peptide |         |
|---------------------------|------------|------|----------------------|---------|-------------------|---------|
|                           |            |      | B (SE)               | P       | B (SE)            | P       |
| <b>rs9260151 (C&gt;T)</b> | 29,911,030 | 0.09 | 0.30 (0.09)          | 7.65E-4 | 0.16 (0.08)       | 4.70E-2 |
| <b>rs61211515 (T/-)</b>   | 30,100,975 | 0.16 | -0.38 (0.07)         | 1.96E-7 | -0.23 (0.07)      | 6.26E-4 |
| <b>rs3135002 (C&gt;A)</b> | 32,668,439 | 0.03 | 0.35 (0.15)          | 1.97E-2 | 0.36 (0.13)       | 7.83E-3 |

Alleles are non-effect allele>effect allele.

Associations were tested using QLIM procedure in SAS version 9.4 (SAS, Cary, NC), and are based on extracted genotypes from dosage data according to the best guess using GTOOL, version 0.7.5 (<http://www.well.ox.ac.uk/~cfreeman/software/gwas/gtool.html>) adjusting for sex, age at diagnosis, T1D duration and cohort (primary vs. secondary).

**ESM Table 12:** Number of imputed variants from MHC imputation in different studies

|                               | <b>DCCT</b> | <b>CACTI</b> | <b>EDC</b> | <b>Medalist</b> | <b>WESDR</b> |
|-------------------------------|-------------|--------------|------------|-----------------|--------------|
| <b>Classical HLA Alleles</b>  | 424         | 424          | 424        | 424             | 424          |
| <b>Polymorphic</b>            | 279         | 233          | 192        | 274             | 217          |
| <b>R<sup>2</sup> &gt; 0.5</b> | 252         | 116          | 115        | 255             | 120          |
| <b>Amino Acid Changes</b>     | 1276        | 1276         | 1276       | 1276            | 1276         |
| <b>Polymorphic</b>            | 1136        | 1045         | 1093       | 1141            | 1044         |
| <b>R<sup>2</sup> &gt; 0.5</b> | 1106        | 812          | 988        | 1128            | 804          |
| <b>SNPs</b>                   | 7261        | 7261         | 7261       | 7261            | 7261         |
| <b>Polymorphic</b>            | 7144        | 6271         | 6236       | 7217            | 6360         |
| <b>R<sup>2</sup> &gt; 0.5</b> | 7066        | 5344         | 5280       | 7211            | 5181         |
| <b>Total</b>                  | 8961        | 8961         | 8961       | 8961            | 8961         |

R<sup>2</sup>: Imputation quality

**ESM Table 13:** Association of rs1264813, rs689, rs151234, rs12971201 and rs193778 with fasting/random C-peptide in each GWAS and in the meta-analysis

|                                         | R <sup>2</sup> | MAF  | Beta  | SE   | P       | Het I <sup>2</sup> | Het P   |
|-----------------------------------------|----------------|------|-------|------|---------|--------------------|---------|
| <b>rs1264813</b>                        |                |      |       |      |         |                    |         |
| Fasting C-peptide                       |                |      |       |      |         |                    |         |
| DCCT                                    | 1.00           | 0.11 | -0.14 | 0.07 | 4.99E-2 |                    |         |
| CACTI                                   | 1.00           | 0.13 | -0.17 | 0.43 | 0.69    |                    |         |
| EDC                                     | 1.00           | 0.15 | 0.02  | 0.90 | 0.98    |                    |         |
| Meta-analysis                           |                |      |       |      | 0.073   | 0.0                | 0.68    |
| Random C-peptide                        |                |      |       |      |         |                    |         |
| Medalist                                | 1.00           | 0.13 | -0.01 | 0.05 | 0.79    |                    |         |
| WESDR                                   | 1.00           | 0.14 | -0.71 | 0.48 | 0.14    |                    |         |
| Meta-analysis                           |                |      |       |      | 0.26    | 0.0                | 0.32    |
| Stimulated/Fasting/Random Meta-analysis |                |      |       |      | 4.90E-4 | 35.3               | 0.16    |
| <b>rs689</b>                            |                |      |       |      |         |                    |         |
| Fasting C-peptide                       |                |      |       |      |         |                    |         |
| DCCT                                    | 0.86           | 0.16 | -0.10 | 0.07 | 0.14    |                    |         |
| CACTI                                   | 0.84           | 0.18 | -0.49 | 0.39 | 0.22    |                    |         |
| EDC                                     | 0.83           | 0.14 | -1.96 | 0.79 | 0.013   |                    |         |
| Meta-analysis                           |                |      |       |      | 0.011   | 44.0               | 0.17    |
| Random C-peptide                        |                |      |       |      |         |                    |         |
| Medalist                                | 0.85           | 0.15 | -0.02 | 0.05 | 0.75    |                    |         |
| WESDR                                   | 0.86           | 0.17 | -0.48 | 0.39 | 0.21    |                    |         |
| Meta-analysis                           |                |      |       |      | 0.31    | 0.0                | 0.44    |
| Stimulated/Fasting/Random Meta-analysis |                |      |       |      | 7.84E-4 | 24.1               | 0.25    |
| <b>rs151234*</b>                        |                |      |       |      |         |                    |         |
| Random C-peptide                        |                |      |       |      |         |                    |         |
| WESDR                                   | 0.55           | 0.18 | 0.25  | 0.47 | 0.60    |                    |         |
| <b>rs12971201</b>                       |                |      |       |      |         |                    |         |
| Fasting C-peptide                       |                |      |       |      |         |                    |         |
| DCCT                                    | 1.00           | 0.38 | -0.07 | 0.05 | 0.12    |                    |         |
| CACTI                                   | 1.00           | 0.35 | 0.09  | 0.30 | 0.76    |                    |         |
| EDC                                     | 1.00           | 0.36 | 1.37  | 0.69 | 0.047   |                    |         |
| Meta-analysis                           |                |      |       |      | 0.57    | 67.7               | 0.045   |
| Random C-peptide                        |                |      |       |      |         |                    |         |
| Medalist                                | 1.00           | 0.37 | -0.06 | 0.04 | 0.14    |                    |         |
| WESDR                                   | 1.00           | 0.37 | 0.42  | 0.29 | 0.14    |                    |         |
| Meta-analysis                           |                |      |       |      | 0.039   | 0.0                | 0.83    |
| Stimulated/Fasting/Random Meta-analysis |                |      |       |      | 0.70    | 64.8               | 9.13E-3 |
| <b>rs193778</b>                         |                |      |       |      |         |                    |         |
| Fasting C-peptide                       |                |      |       |      |         |                    |         |
| DCCT                                    | 1.00           | 0.26 | -0.06 | 0.05 | 0.22    |                    |         |
| CACTI                                   | 0.99           | 0.29 | -0.34 | 0.32 | 0.28    |                    |         |
| EDC                                     | 1.00           | 0.22 | -1.50 | 0.87 | 0.08    |                    |         |
| Meta-analysis                           |                |      |       |      | 0.043   | 0.0                | 0.46    |
| Random C-peptide                        |                |      |       |      |         |                    |         |
| Medalist                                | 1.00           | 0.26 | -0.07 | 0.04 | 0.101   |                    |         |
| WESDR                                   | 1.00           | 0.25 | -0.08 | 0.32 | 0.80    |                    |         |
| Meta-analysis                           |                |      |       |      | 0.15    | 0.0                | 0.40    |
| Stimulated/Fasting/Random Meta-analysis |                |      |       |      | 6.47E-3 | 0.0                | 0.44    |

R<sup>2</sup>: Quality of imputation

\* rs151234 had poor imputation quality in CACTI, WESDR and EDC.

**ESM Table 14:** Association of *HLA-A\*24* and *HLA-A\*24:02* with C-peptide

| Study              |                                 | R <sup>2</sup> | Freq | HWE P | Beta* | SE   | P       |
|--------------------|---------------------------------|----------------|------|-------|-------|------|---------|
| <i>HLA-A*24</i>    |                                 |                |      |       |       |      |         |
| Stimulated         |                                 |                |      |       |       |      |         |
|                    | DCCT                            | 1.00           | 0.10 | 0.26  | -0.39 | 0.09 | 1.50E-5 |
|                    | Further adjusted for rs61211515 | -              | -    | -     | -0.18 | 0.11 | 0.09    |
| Fasting            |                                 |                |      |       |       |      |         |
|                    | DCCT                            | -              | -    | -     | -0.21 | 0.08 | 0.01    |
| Random             |                                 |                |      |       |       |      |         |
|                    | Medalist                        | 1.00           | 0.12 | 1     | -0.11 | 0.06 | 0.061   |
| <i>HLA-A*24:02</i> |                                 |                |      |       |       |      |         |
| Stimulated         |                                 |                |      |       |       |      |         |
|                    | DCCT                            | 0.95           | 0.10 | 0.26  | -0.41 | 0.10 | 1.57E-5 |
|                    | Further adjusted for rs61211515 | -              | -    | -     | -0.18 | 0.11 | 0.10    |
| Fasting            |                                 |                |      |       |       |      |         |
|                    | DCCT                            | -              | -    | -     | -0.21 | 0.09 | 0.01    |
| Random             |                                 |                |      |       |       |      |         |
|                    | Medalist                        | 1.00           | 0.12 | 1     | -0.11 | 0.06 | 0.062   |

R<sup>2</sup>: Quality of imputation

Of the DCCT subjects with *HLA-A\*24*, all but one (who was heterozygous for *HLA-A\*24:07*) had *HLA-A\*24:02*. Both *HLA-A\*24* and *HLA-A\*24:02* had poor imputation quality in CACTI, EDC and WESDR.

\* C-peptide is measured with different assays in pmol/mL in DCCT, Medalist and WESDR; and in pmol/L in CACTI and EDC. It is also natural log transformed.



**ESM Table 15:** Association of DR3/DR4 categories with stimulated C-peptide at DCCT eligibility

|         | N   | Primary |      |       | Secondary<br>Duration <5 yrs |      |       | Secondary<br>Duration >5 yrs |      |       | Meta-analysis |      |       |                       |          |
|---------|-----|---------|------|-------|------------------------------|------|-------|------------------------------|------|-------|---------------|------|-------|-----------------------|----------|
|         |     | BETA    | SE   | P     | BETA                         | SE   | P     | BETA                         | SE   | P     | BETA          | SE   | P     | Het<br>I <sup>2</sup> | Het<br>P |
| DR3/X   | 225 | 0.02    | 0.14 | 0.901 | 0.62                         | 0.34 | 0.067 | -0.16                        | 0.29 | 0.585 | 0.06          | 0.12 | 0.596 | -                     |          |
| DR3/DR3 | 114 | 0.20    | 0.18 | 0.271 | 0.35                         | 0.39 | 0.377 | -0.29                        | 0.36 | 0.416 | 0.14          | 0.15 | 0.353 | -                     | -        |
| DR3/DR4 | 340 | 0.27    | 0.14 | 0.051 | 0.73                         | 0.31 | 0.019 | -0.09                        | 0.25 | 0.715 | 0.26          | 0.11 | 0.024 | 53.10                 | 0.12     |
| X/DR4   | 323 | 0.08    | 0.13 | 0.546 | 0.67                         | 0.35 | 0.055 | 0.18                         | 0.25 | 0.474 | 0.16          | 0.11 | 0.152 | -                     | -        |
| DR4/DR4 | 89  | -0.15   | 0.20 | 0.446 | 0.28                         | 0.45 | 0.534 | -0.01                        | 0.37 | 0.985 | -0.07         | 0.16 | 0.689 | -                     | -        |
| X/X     | 212 | Ref     | -    | -     | Ref                          | -    | -     | Ref                          | -    | -     | Ref           | -    | -     | -                     | -        |

Het: Heterozygosity

DR3/DR4 categories were defined based on rs2187668 and rs7454108 [10] both genotyped in DCCT.

**ESM Table 16:** Association of 4 identified variants for C-peptide with T1D [12, 13]

| SNP        | Alleles | Affymetrix Platform<br>1,390 cases & 4,830 Controls |       |      |           | Illumina Platform<br>3,983 Cases and 3,999 Controls |       |      |           | Meta-analysis<br>5,913 Cases & 8,828 Controls |                 |       |           |
|------------|---------|-----------------------------------------------------|-------|------|-----------|-----------------------------------------------------|-------|------|-----------|-----------------------------------------------|-----------------|-------|-----------|
|            |         | INFO                                                | OR    | SE   | P         | INFO                                                | OR    | SE   | P         | BETA*                                         | SE <sup>†</sup> | OR    | P         |
| rs9260151  | C>T     | 0.91                                                | 0.74  | 0.07 | 2.63E-06  | 0.92                                                | 0.69  | 0.05 | 2.08E-12  | -0.35                                         | 0.04            | 0.70  | 6.43E-17  |
| rs61211515 | T/-     | 0.79                                                | 0.98  | 0.05 | 0.653     | 0.81                                                | 1.01  | 0.05 | 0.829     | -0.00                                         | 0.04            | 1.00  | 0.909     |
| rs3135002  | A>C     | 0.81                                                | 27.39 | 0.20 | 4.69E-216 | 0.88                                                | 13.57 | 0.10 | 9.00E-300 | 2.75                                          | 0.09            | 15.58 | 4.96E-209 |
| rs559047   | T>A     | 0.96                                                | 0.97  | 0.05 | 0.542     | 0.96                                                | 0.96  | 0.04 | 0.256     | -0.04                                         | 0.03            | 0.96  | 0.202     |

Alleles are non-effect allele>effect allele.

\* Log-odds ratio

† Standard error of the log-odds ratio

**SUPPLEMENTARY Figures**

**ESM Figure 1: Distribution of stimulated C-peptide at DCCT eligibility**

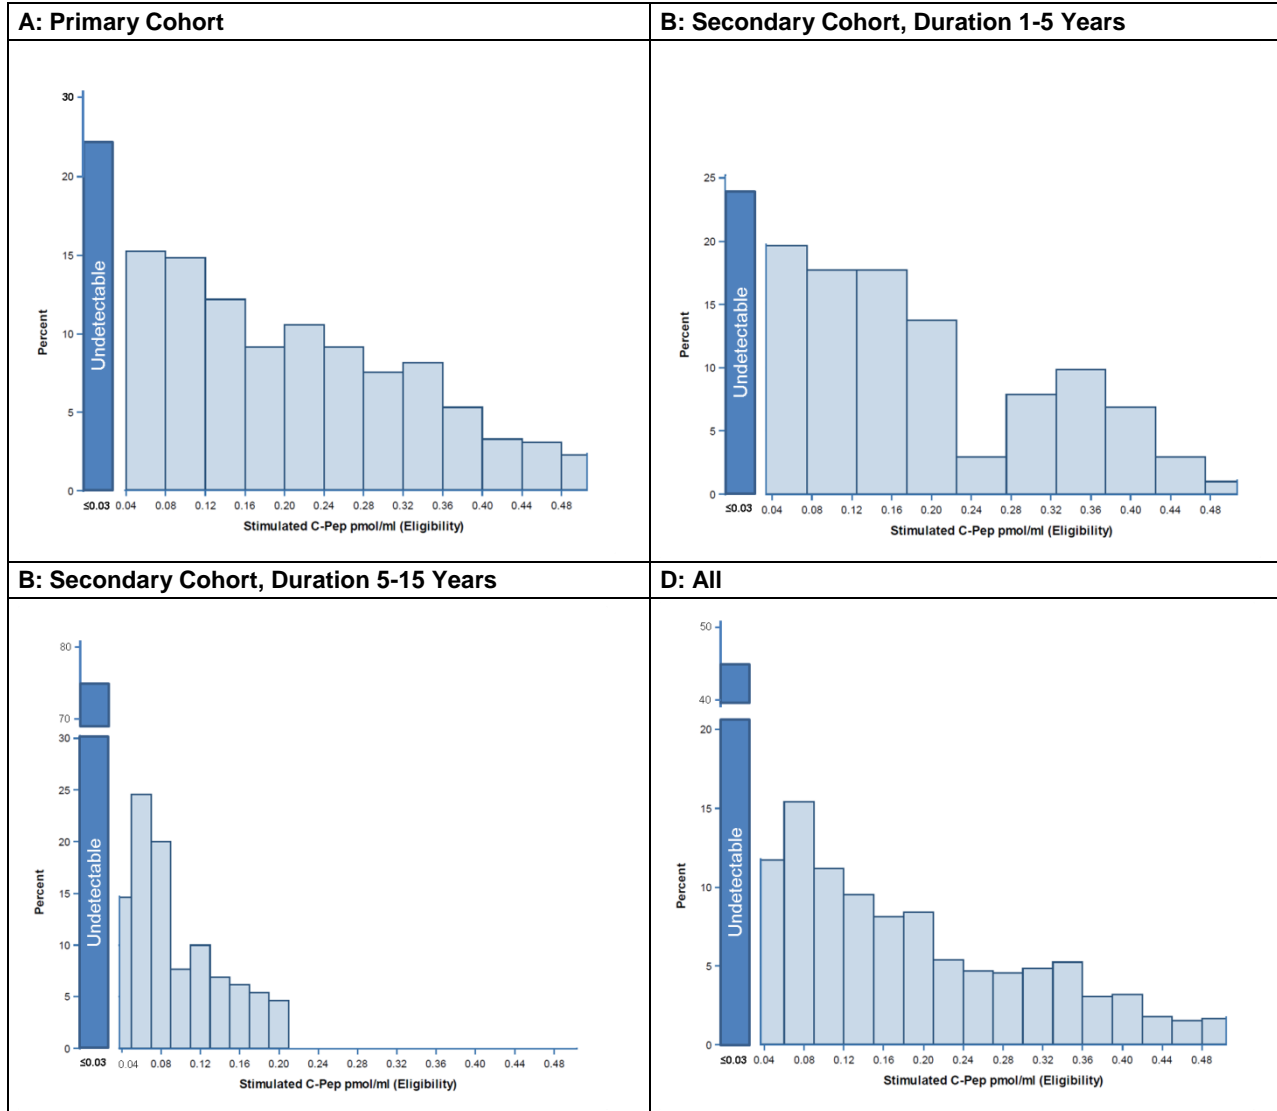

**ESM Figure 2:** Distribution of fasting/random C-peptide in different cohorts

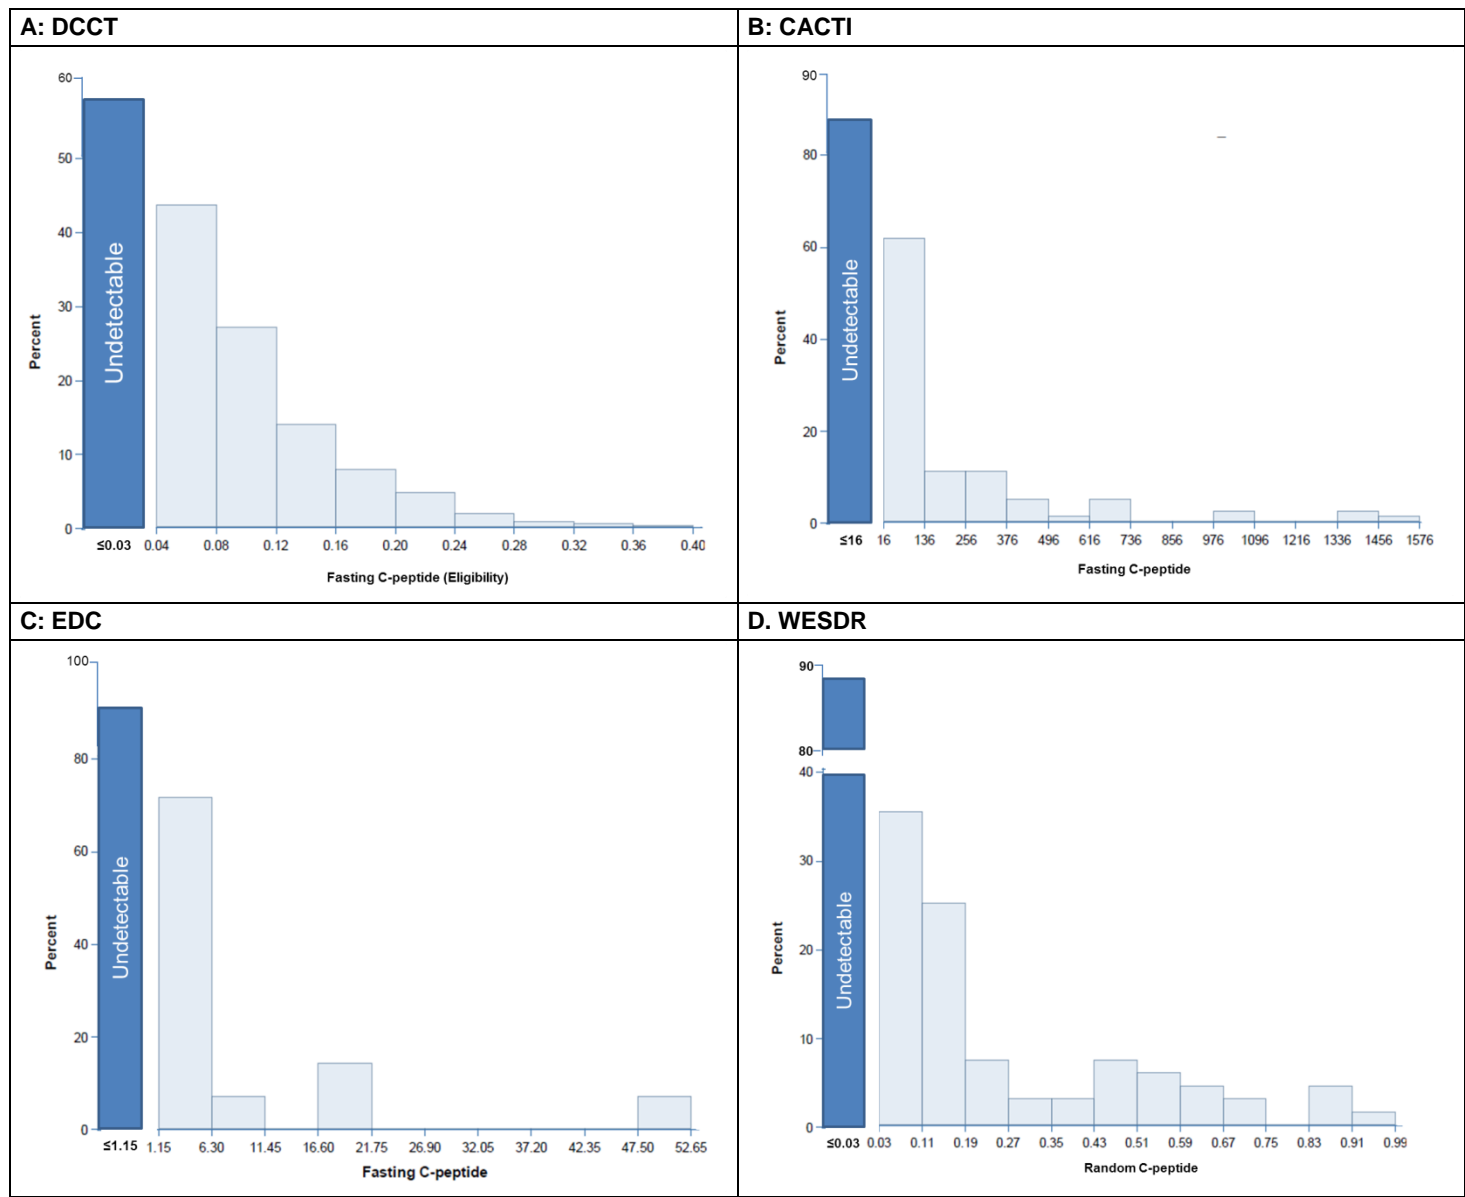

**ESM Figure 3:** The Manhattan plot of stimulated/fasting/random (A) stimulated (B), fasting (C), random (D) and C-peptide meta-GWAS

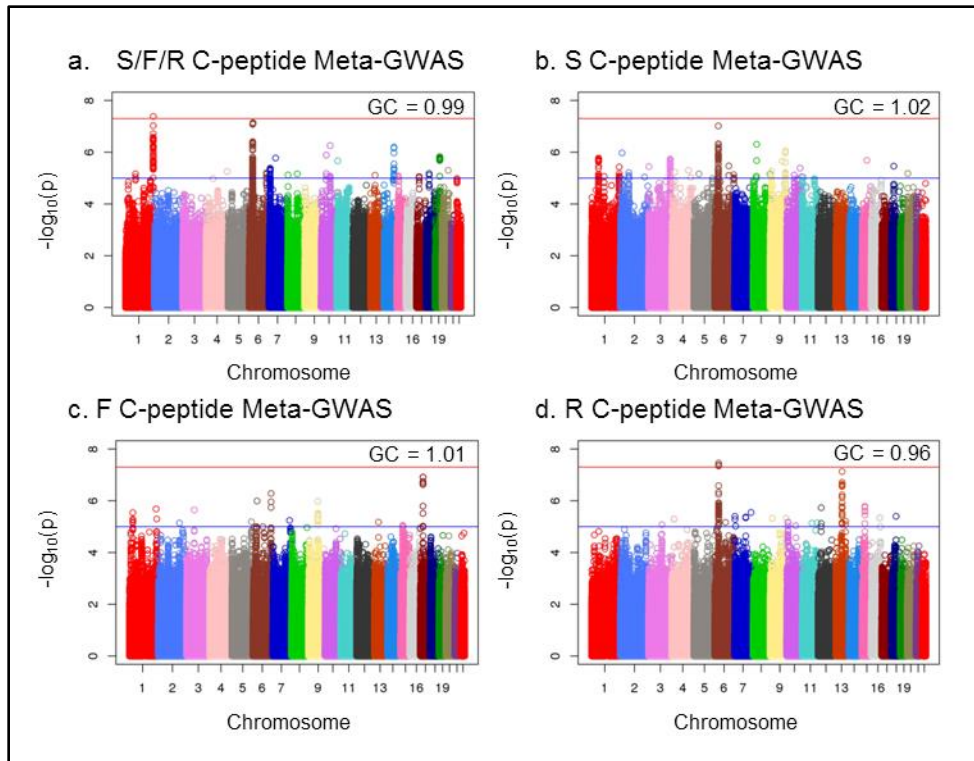

The Manhattan plots for stimulated/fasting/random (S/F/R), stimulated (S), fasting (F) and random (R) C-peptide meta-GWAS show  $-\log_{10}(p)$ -values (y-axis) of SNPs plotted against their chromosomal positions (x-axis). The red horizontal line represents the genome-wide significant threshold ( $p = 5 \times 10^{-8}$ ) and the blue line represents suggestive association threshold ( $p = 1 \times 10^{-5}$ ). a: Included stimulated C-peptide results from DCCT Primary Cohort, Secondary Cohort with duration 1-5 years, Secondary Cohort with diabetes duration 5-15 years; fasting C-peptide results from CACTI and EDC; and random C-peptide results from Medalist and WESDR. b: Included DCCT Primary Cohort, Secondary Cohort with duration 1-5 years and Secondary Cohort with duration 5-15 years c: Included DCCT, CACTI and EDC d: Included Medalist and WESDR

**ESM Figure 4:** The QQ-plot of stimulated (A), fasting (B), random (C) and stimulated/fasting/random (D) C-peptide meta-GWAS

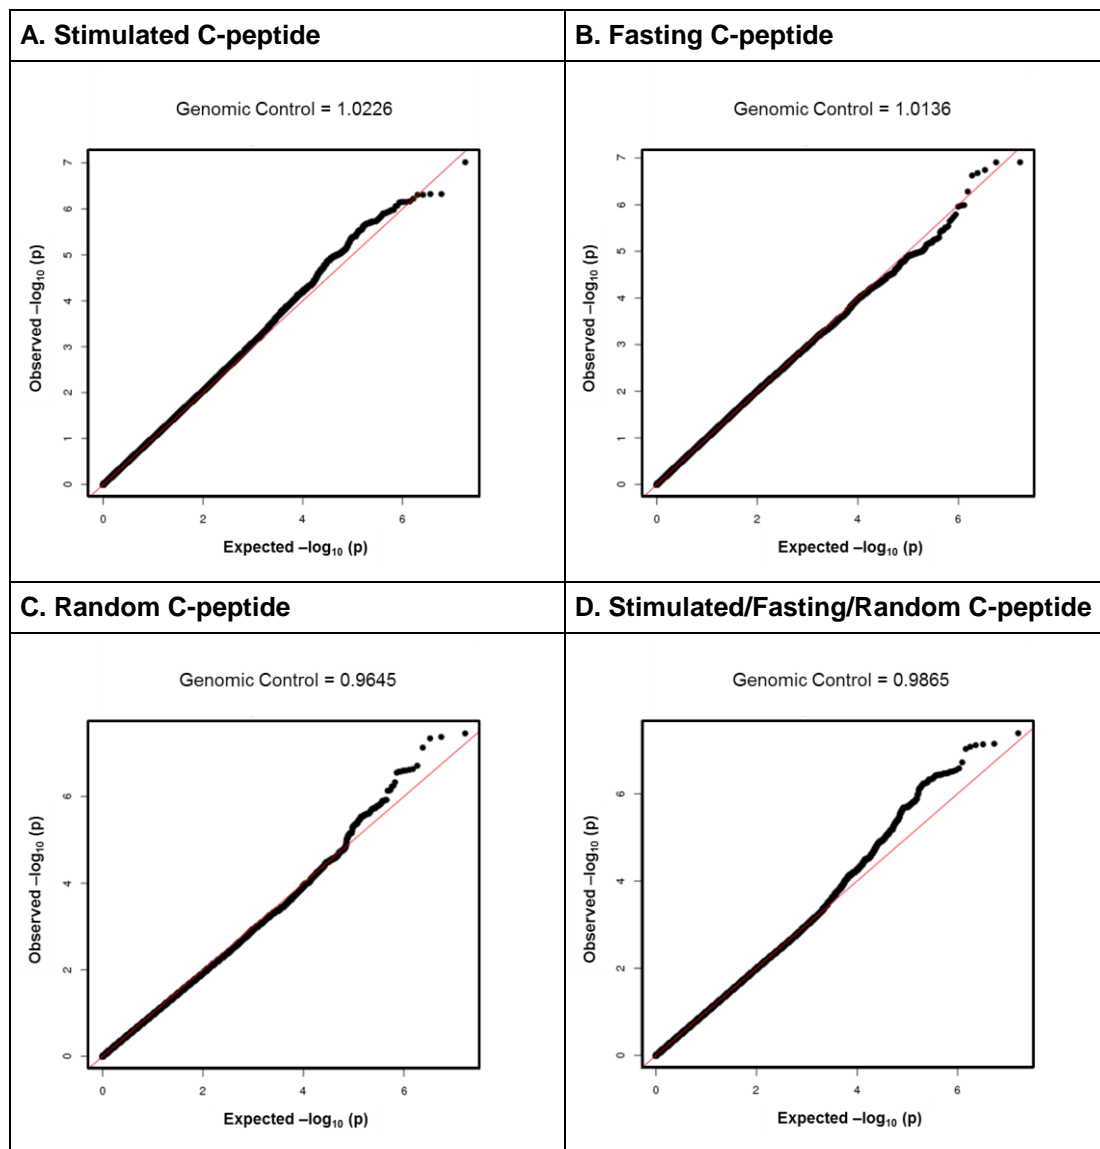

The quantiles of observed versus expected  $-\log_{10}(p\text{-values})$  regarding SNP (Chr1-22 genotyped and imputed SNPs with minor allele frequency  $>0.01$  and high imputation quality ( $\text{INFO} >0.80$  or  $R^2 >0.5$ )) associations with  $\text{Ln}(\text{C-peptide})$  were plotted. A: Included DCCT Primary Cohort, Secondary Cohort with duration 1-5 years and Secondary Cohort with duration 5-15 years B: Included DCCT, CACTI and EDC C: Included Medalist and WESDR D: Included stimulated C-peptide results from DCCT Primary Cohort, Secondary Cohort with duration 1-5 years and Secondary Cohort with duration 5-15 years; fasting C-peptide results from CACTI and EDC; and random C-peptide results from Medalist and WESDR

## REFERENCES

- [1] Paterson AD, Waggott D, Boright AP, et al. (2010) A genome-wide association study identifies a novel major locus for glycemic control in type 1 diabetes, as measured by both A1C and glucose. *Diabetes* 59: 539-549
- [2] Delaneau O, Marchini J, Zagury JF (2011) A linear complexity phasing method for thousands of genomes. *Nature methods* 9: 179-181
- [3] Delaneau O, Zagury JF, Marchini J (2013) Improved whole-chromosome phasing for disease and population genetic studies. *Nature methods* 10: 5-6
- [4] Auton A, Brooks LD, Durbin RM, et al. (2015) A global reference for human genetic variation. *Nature* 526: 68-74
- [5] Howie BN, Donnelly P, Marchini J (2009) A flexible and accurate genotype imputation method for the next generation of genome-wide association studies. *PLoS genetics* 5: e1000529
- [6] Fuchsberger C, Abecasis GR, Hinds DA (2015) minimac2: faster genotype imputation. *Bioinformatics (Oxford, England)* 31: 782-784
- [7] Howie B, Fuchsberger C, Stephens M, Marchini J, Abecasis GR (2012) Fast and accurate genotype imputation in genome-wide association studies through pre-phasing. *Nature genetics* 44: 955-959
- [8] Oram RA, Patel K, Hill A, et al. (2016) A Type 1 Diabetes Genetic Risk Score Can Aid Discrimination Between Type 1 and Type 2 Diabetes in Young Adults. *Diabetes care* 39: 337-344
- [9] Onengut-Gumuscu S, Chen WM, Burren O, et al. (2015) Fine mapping of type 1 diabetes susceptibility loci and evidence for colocalization of causal variants with lymphoid gene enhancers 47: 381-386
- [10] Winkler C, Krumsiek J, Buettner F, et al. (2014) Feature ranking of type 1 diabetes susceptibility genes improves prediction of type 1 diabetes. *Diabetologia* 57: 2521-2529
- [11] Barker JM, Triolo TM, Aly TA, et al. (2008) Two single nucleotide polymorphisms identify the highest-risk diabetes HLA genotype: potential for rapid screening. *Diabetes* 57: 3152-3155
- [12] Censin JC, Nowak C, Cooper N, Bergsten P, Todd JA, Fall T (2017) Childhood adiposity and risk of type 1 diabetes: A Mendelian randomization study. *PLoS medicine* 14: e1002362
- [13] Censin JC, Nowak C, Cooper N, Bergsten P, Todd JA, Fall T (2017) Data from: Childhood adiposity and type 1 diabetes: a Mendelian randomization study In, Dryad Digital Repository
